# Supplementary material
Source: PubMed Central journal article supplement (PMC5161587)
Supplement: NIHMS812217-supplement-Supplementary_Information.pdf [file NIHMS812217-supplement-Supplementary_Information.pdf]

## Supplementary Information

### Sequences for short hairpin RNA

| Name             | Sequences             |
|------------------|-----------------------|
| PGC1 $\alpha$ #1 | GCAGAGTATGACGATGGTATT |
| PGC1 $\alpha$ #2 | CCGTTATACCTGTGATGCTTT |
| ID2 #1           | CCCTTCTGAGTTAATGTCAAA |
| ID2 #2           | CCCCTATTGTCAGCCTGCAT  |
| ID3              | GCCCACTTGACTTCACCAAAT |
| TCF4             | CACGAAATCTTCGGAGGACAA |
| Control          | CCTAAGGTTAAGTCGCCCTCG |

### Sequences for CRISPR guide-RNA

| Name            | Sequences            |
|-----------------|----------------------|
| sgPGC1 $\alpha$ | GACTGTCTAGTGTCTCTGTG |
| sgID2-#1        | GCTCATCGGGTCGTCCACAG |
| sgID2-#2        | GTCCACAGGGGTTTTGCTCC |

### Sequences for quantitative RT-PCR

| Name          |   | Sequences             |
|---------------|---|-----------------------|
| PGC1 $\alpha$ | F | GTAAATCTGCGGGATGATGG  |
|               | R | AATTGCTTGCGTCCACAAA   |
| ITGA3         | F | AAGGGACCTTCAGGTGCA    |
|               | R | TGTAGCCGGTGATTTACCAT  |
| ITGA4         | F | GCTTCTCAGATCTGCTCGTG  |
|               | R | GTCACTTCCAACGAGGTTTG  |
| ITGA10        | F | GGTGGTTGTCACTGATGGAG  |
|               | R | GTCACTCTTCCAGCCTCACA  |
| ITGB3         | F | CCGTGACGAGATTGAGTCA   |
|               | R | AGGATGGACTTTCCACTAGAA |

|        |   |                          |
|--------|---|--------------------------|
| ITGB5  | F | GGAGCCAGAGTGTGGAAACA     |
|        | R | GAAACTTTGCAAACCTCCCTC    |
| CAV1   | F | CAAATGCCGTCAAACTGTG      |
|        | R | CGACCCTAAACACCTCAACG     |
| CAV2   | F | TGAAGGCAGAACCATTAGGC     |
|        | R | TCATTGCGGGAATTCTCTTT     |
| ACTN2  | F | GGCTTTCCTTAGGTGGGAGT     |
|        | R | ACATGATCCAGGAGGAGGAG     |
| LAMA4  | F | CCGACAGGGTGTGAAAGAAT     |
|        | R | AGACCCGCCTGAGACGA        |
| COL4A1 | F | CCTTTTGTCCCTTCACTCCA     |
|        | R | CTCCACGAGGAGCACAGC       |
| INHBA  | F | GTGATGGCAAGGTCAACATC     |
|        | R | CTCGCAGTAGTTGGCATGAT     |
| TGFBR2 | F | GGAAACTTGACTGCACCGTT     |
|        | R | CTGCACATCGTCCTGTGG       |
| TGFBR3 | F | CAGTGAAGCTCTCCATCAAGG    |
|        | R | AGCTCCTGTTTAGCCACTGC     |
| SMAD3  | F | CCCTGGCTACCTGAGTGAAG     |
|        | R | ATTCGGGGATAGGTTTGGAG     |
| SMAD7  | F | CCAGGCTCCAGAAGAAGTTG     |
|        | R | CCAAGTGCAGACTGTCCAGA     |
| TGFBI  | F | TTGAGAGTGGTAGGGCTGCT     |
|        | R | CAAAGGAAAATCTGTGGCA      |
| IL-8   | F | GAATGGGTTTGCTAGAATGTGATA |
|        | R | CAGACTAGGGTTGCCAGATTTAAC |
| IL-11  | F | AGCTCTACAGCTCCCAGGTG     |
|        | R | CCGCAGGTAGGACAGTAGGT     |
| LEF-1  | F | GACGAGATGATCCCCTTCAA     |
|        | R | CTTCCTCTTCGGGATGACTG     |

|                 |   |                          |
|-----------------|---|--------------------------|
| TCF7L2          | F | GCACCACTGGCACTTTGTTA     |
|                 | R | ATGGCCACTGCTTGATGTC      |
| SFRP1           | F | TCTACACCAAGCCACCTCAG     |
|                 | R | GGCAGCACCATCTTCTTGTA     |
| ID1             | F | CTACGACATGAACGGCTGTTACTC |
|                 | R | CTTGCTCACCTTGCGGTTCT     |
| ID2             | F | CAACACGGATATCAGCATCC     |
|                 | R | CGCTTATTCAGCCACACAGT     |
| ID3             | F | TGAACTTGTGGCCTGAAGAG     |
|                 | R | CATAGTTTGGAGAGCAGCCA     |
| ID4             | F | CCGAGCCAGGAGCACTAGAG     |
|                 | R | CTTGGAATGACGAATGAAAACG   |
| TCF4<br>(ITF-2) | F | CATAGGGAGTCCCATCTCCA     |
|                 | R | GGACCAACTTCTTTGGCAAG     |
| c-Myc           | F | CTACCCTCTCAACGACAGCA     |
|                 | R | AGAGCAGAGAATCCGAGGAC     |
| TCF3            | F | CCCAGGAGCCTGAGCTG        |
|                 | R | CTGTCACCAACGGGAAGG       |
| TCF12           | F | GGAAGGACTTGGTTGACCACT    |
|                 | R | GACCAACTACACTGGGAAGCA    |
| GSTM4           | F | TTGGAGAACCAGGCTATGGAC    |
|                 | R | TTCCCAGGAACTGTGAGAAGT    |
| COX5A           | F | GGGAATTGCGTAAAGGGATAA    |
|                 | R | TCCTGCTTTGTCCTTAACAACC   |

### Sequences for ChIP qPCR

| Name         |   | Sequences             |
|--------------|---|-----------------------|
| ITGA4 (-1.3) | F | TCAGTCCTGCCTTACTCTTG  |
|              | R | GTCTGCATCAAAGAGTGTGTC |
| ITGA4 (-1.0) | F | AGGGCACACCTGGATTG     |

|               |   |                           |
|---------------|---|---------------------------|
|               | R | GATTCGGATTGCTCCAGC        |
| ITGB3 (-1.0)  | F | TTAAGGTCCTAGTGTTTGGGAG    |
|               | R | GATGCCAGACAACTGG          |
| ITGB3 (-0.3)  | F | ACTGAACCGGTTTCAGAGAAGG    |
|               | R | TTGGGACACATTACCCACTA      |
| ITGB5 (-3.0)  | F | AAATCACCCTTGGCACG         |
|               | R | CAAGATAGCGCCACTGC         |
| ITGB5 (-2.0)  | F | CAGAGGGAGCAATCAGGTATTC    |
|               | R | CAAGCTGGGAACCGTGT         |
| ITGB5 (-1.5)  | F | ACTGGATAACAGTAGGGTTG      |
|               | R | GGTGCAGGAAAGGATGC         |
| ITGB5 (-1.0)  | F | GATAAGATGAAAGCCTGAGC      |
|               | R | CTGTGTCTGCCTCCTAAA        |
| ITGA10 (-3.0) | F | CAAGCAATTCTCATGCCTCAGCCTC |
|               | R | GTCCAGTATGAGAAGTCCTCTGGCC |
